# Supplementary material
Source: Royal Society of Chemistry journal article supplement (doi:10.1039/d6ew00235h)
Supplement: d6ew00235h1.pdf [file d6ew00235h1.pdf]

## Supplementary material

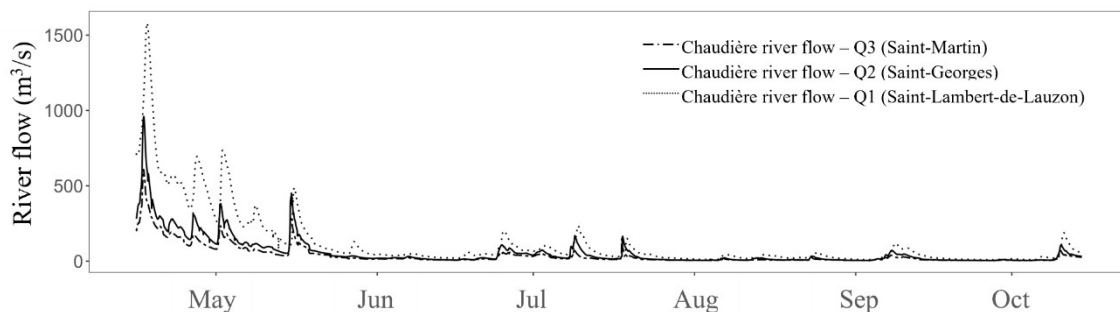

**Figure S1.** Time series plot of Chaudière River at Q1 – Saint-Lambert-de-Lauzon, Q2 – Saint-Georges, and Q3 – Saint-Martin

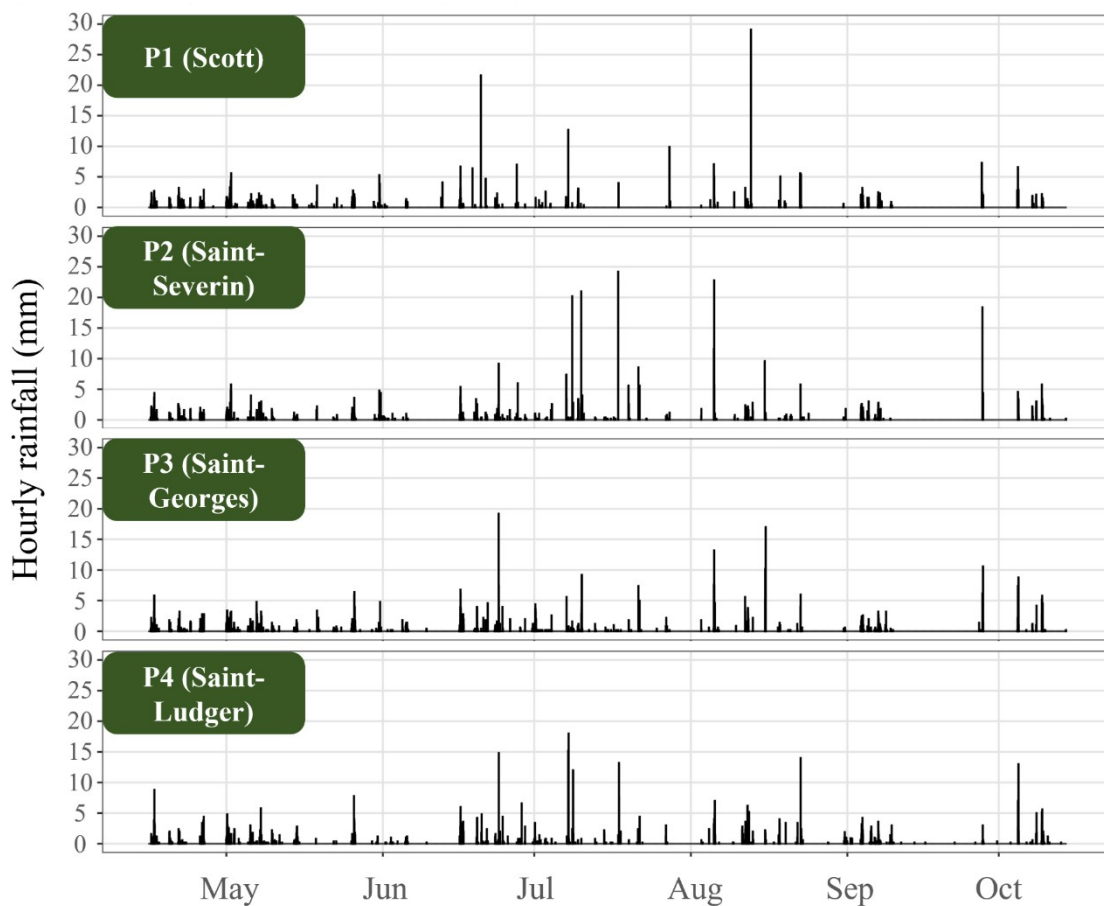

**Figure S2.** Time series plot of rainfall at P1 – Scott, P2 – Sainte-Marie, P3 – Saint-Georges, and P4 – Saint-Ludger

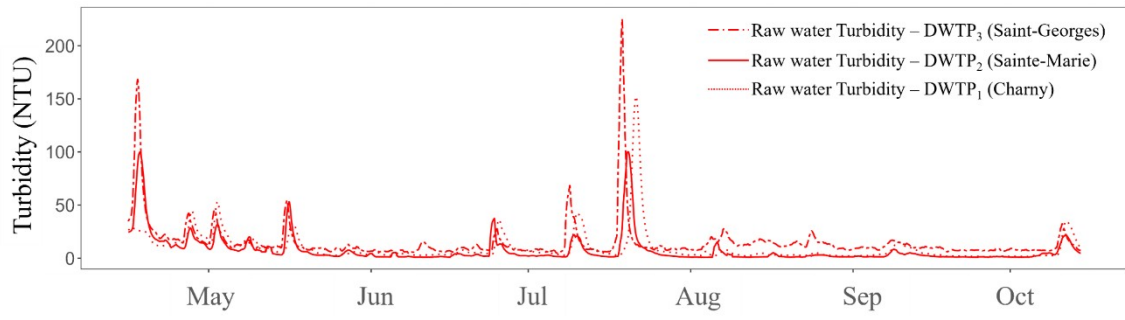

**Figure S3. Time series plot of raw water Turbidity at the DWTP<sub>1</sub> – Charny, DWTP<sub>2</sub> – Sainte-Marie, and DWTP<sub>3</sub> – Saint-Georges.**
